# Supplementary material for: Re-classification of Clavibacter michiganensis subspecies on the basis of whole-genome and multi-locus sequence analyses
Source: PubMed Central journal article supplement (PMC5882085; doi:10.1099/ijsem.0.002492), 2017-11-21
Supplement: ijsem-68-234-s001.pdf [file ijsem-68-234-s001.pdf]

### Supplementary materials

Figure S1. Single gene phylogenetic trees: *acnA* (a), *gapA* (b), *icdA* (c), *mdh* (d), *md1D* (e), *pgi* (f), and *proA* (g) showing relationships of the *Clavibacter* clades of the seven house-keeping gene sequences. *Leifsonia xyli* serves as the out group. \*: Current work. T: Type strain.

(a), *acnA*

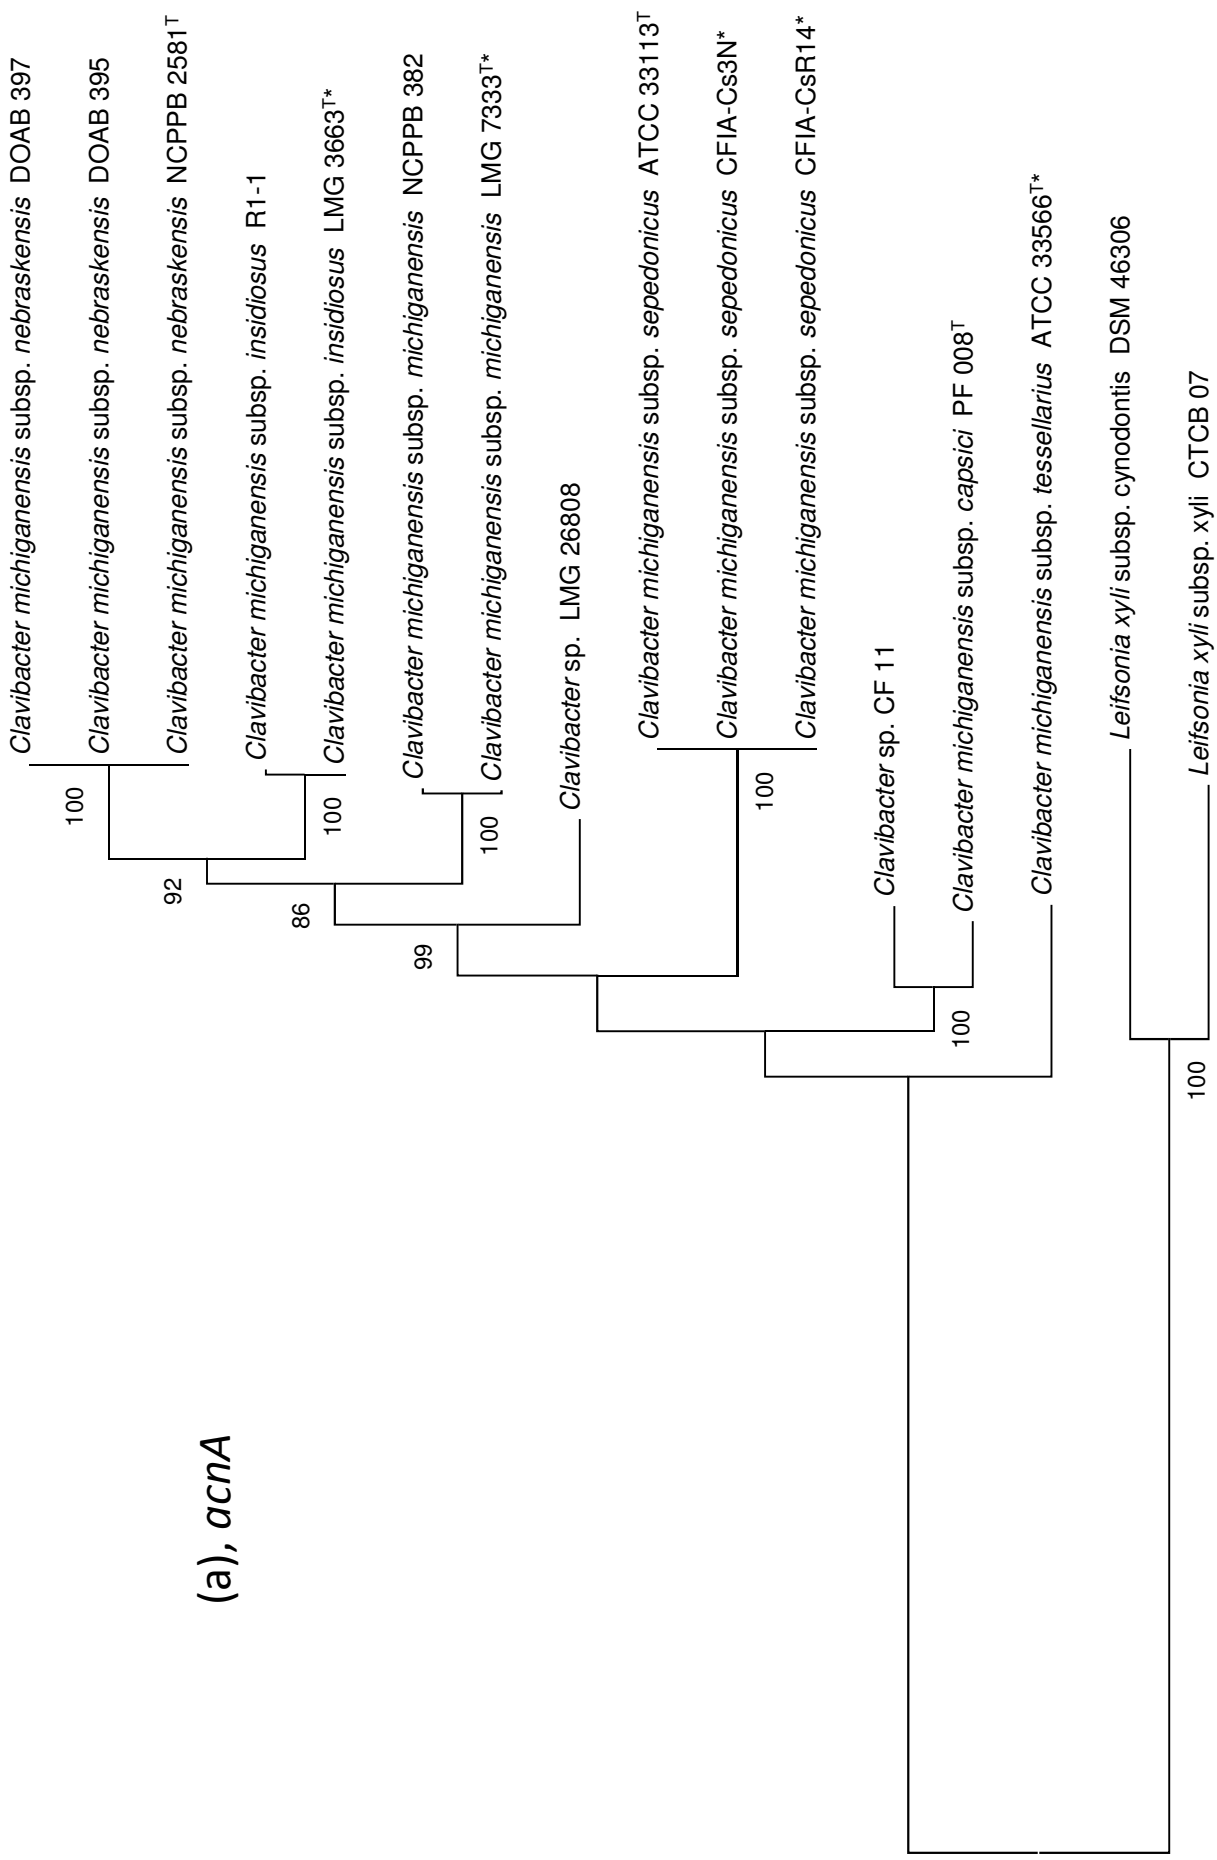

0.05

(b), *gapA*

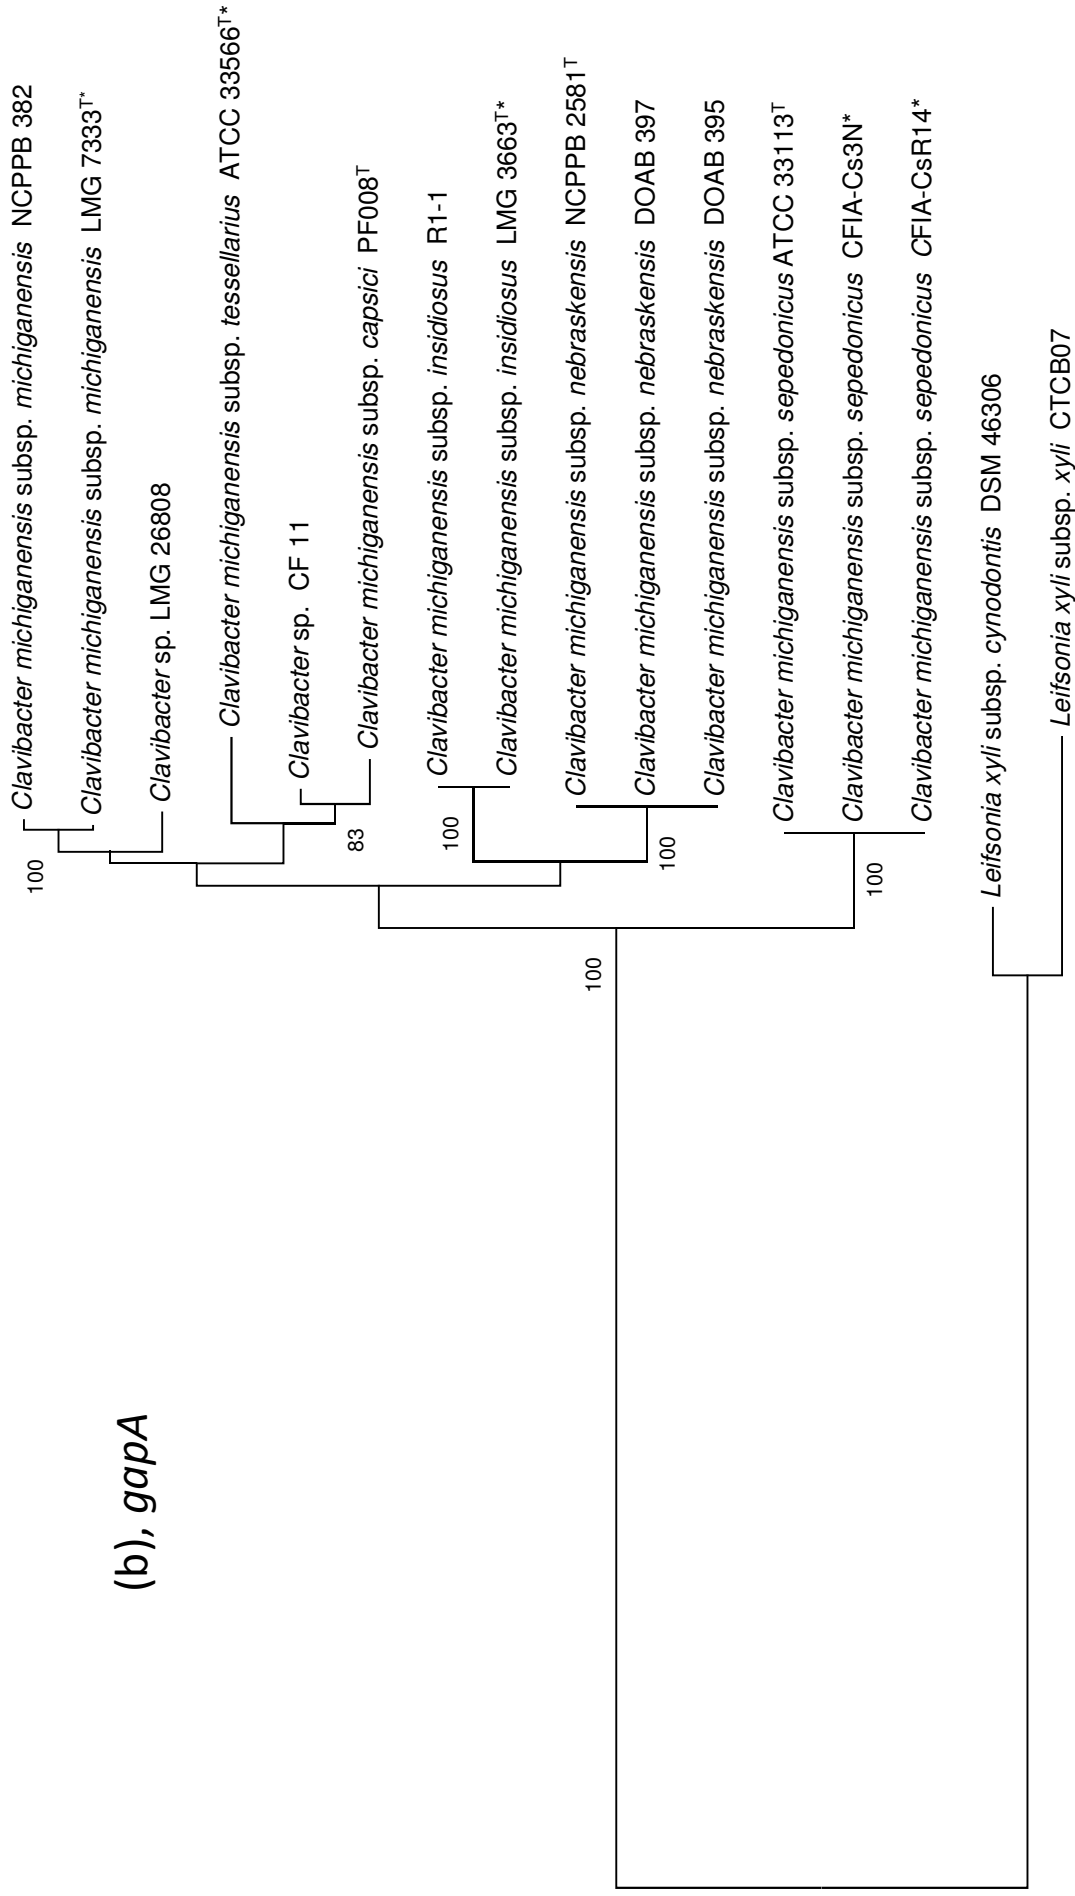

0.05

(c), *icdA*

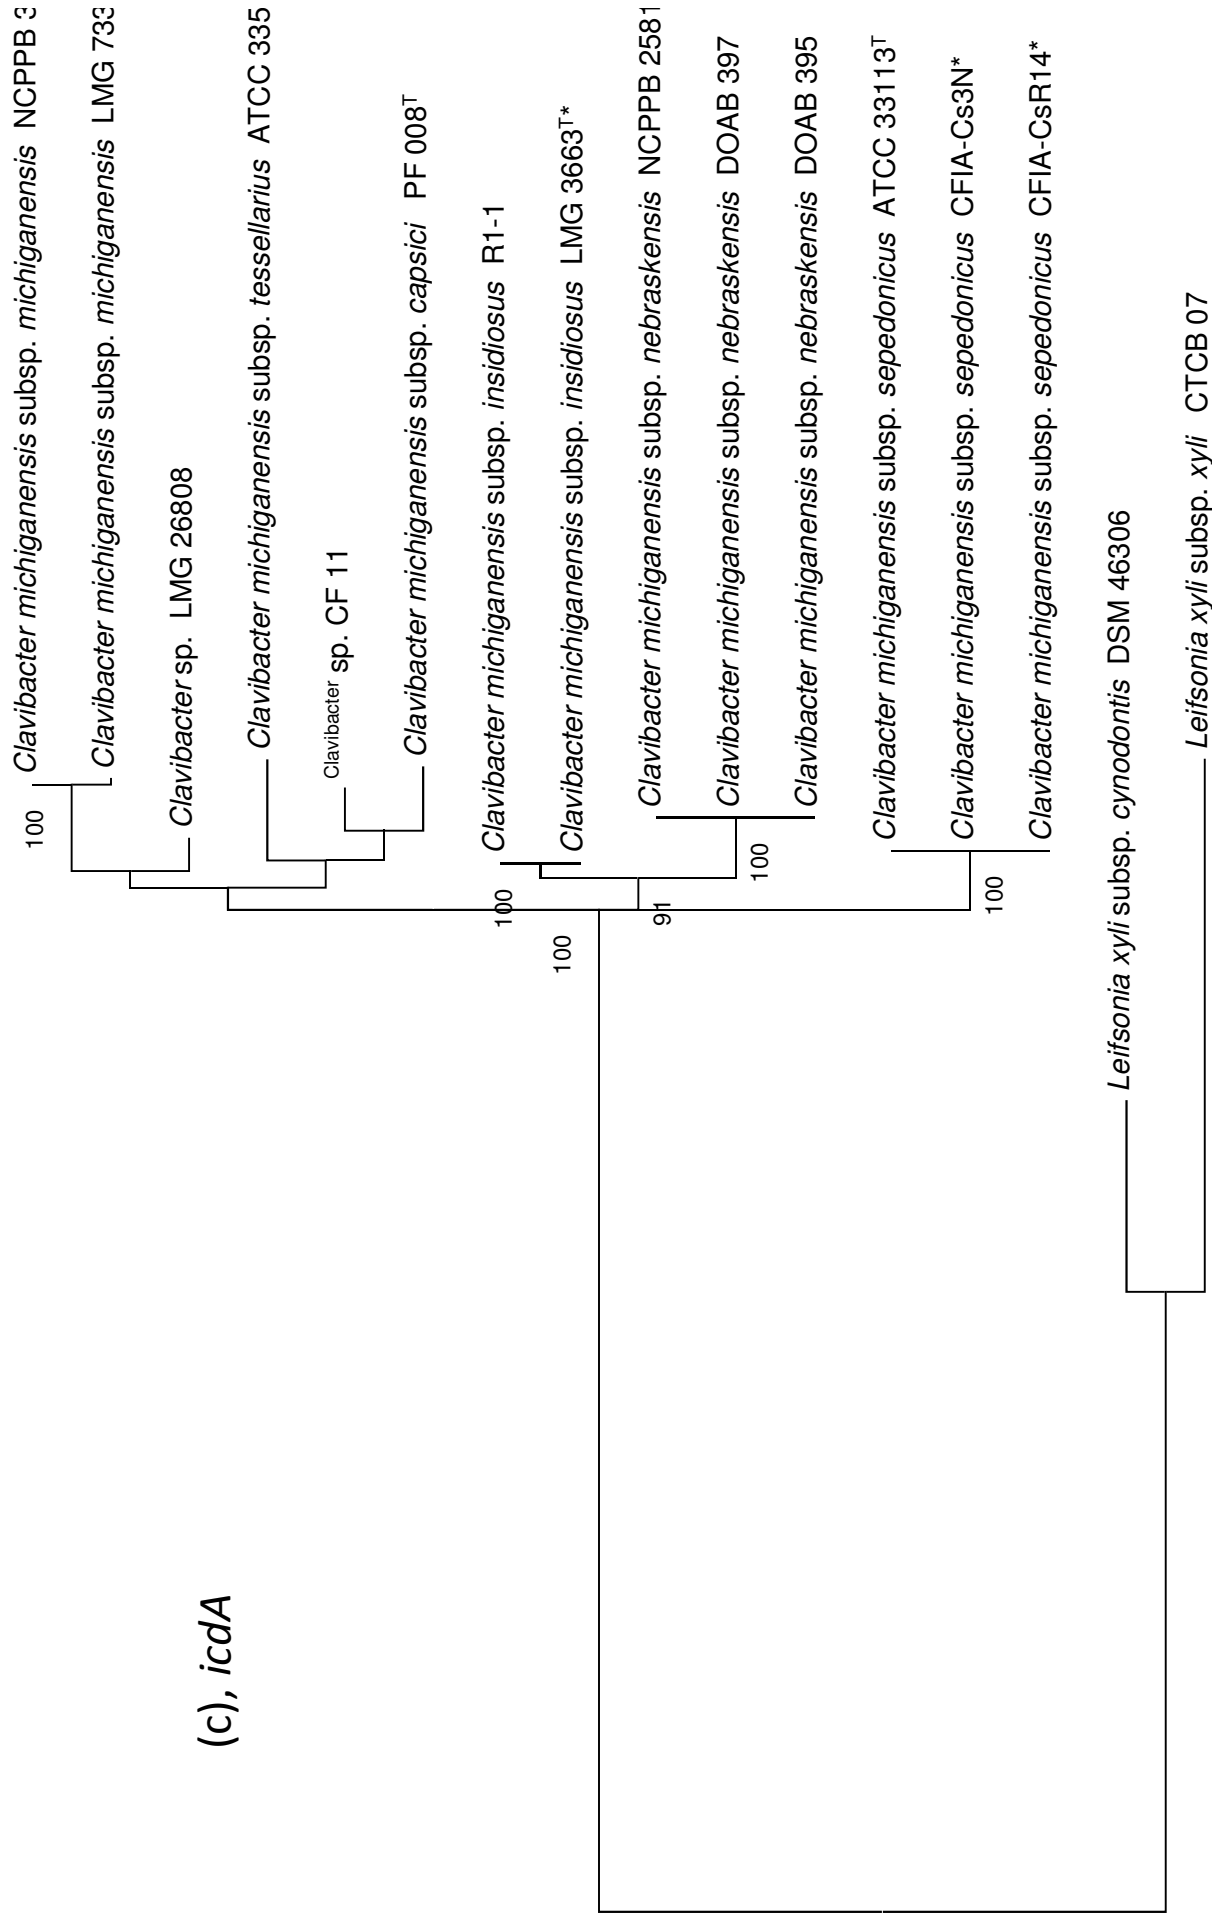

(d), *mdh*

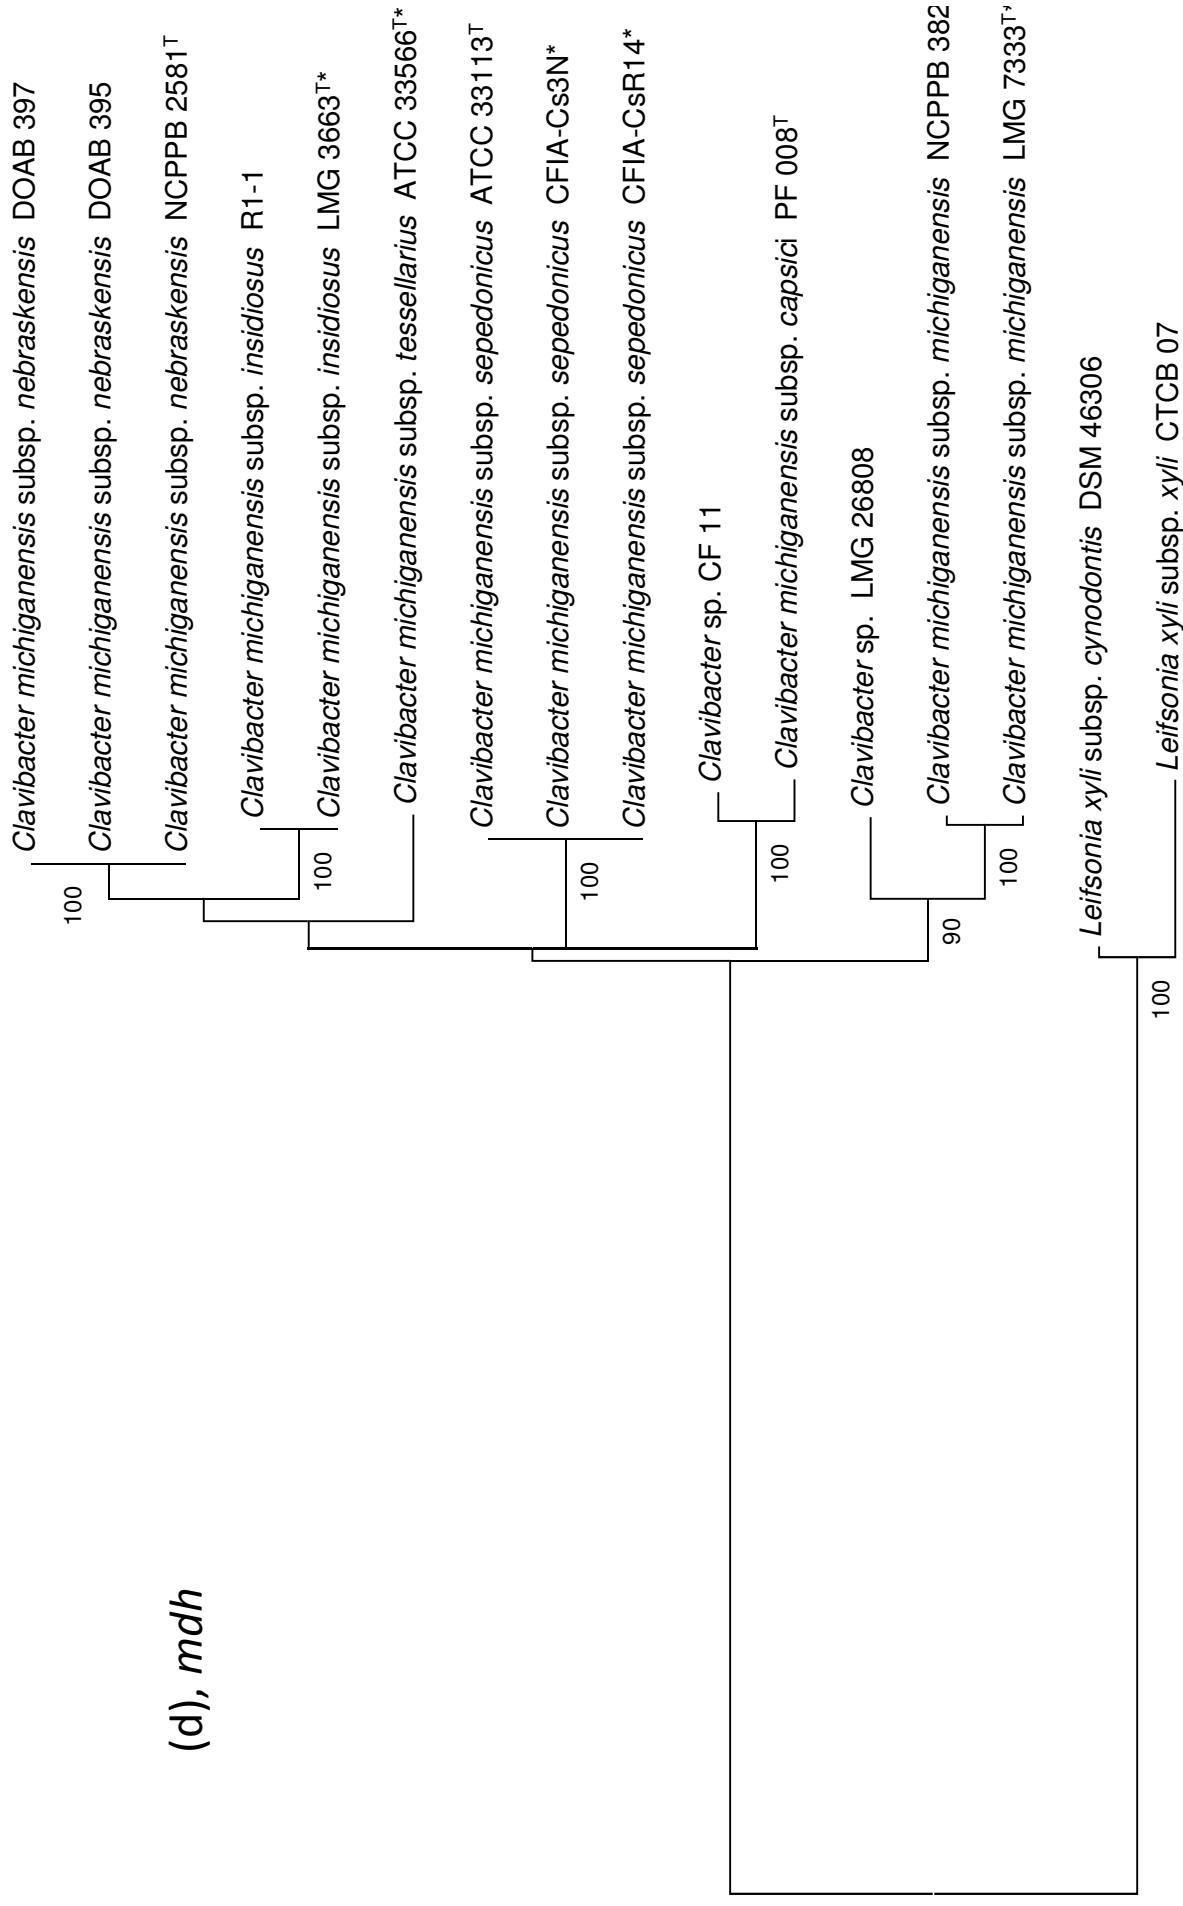

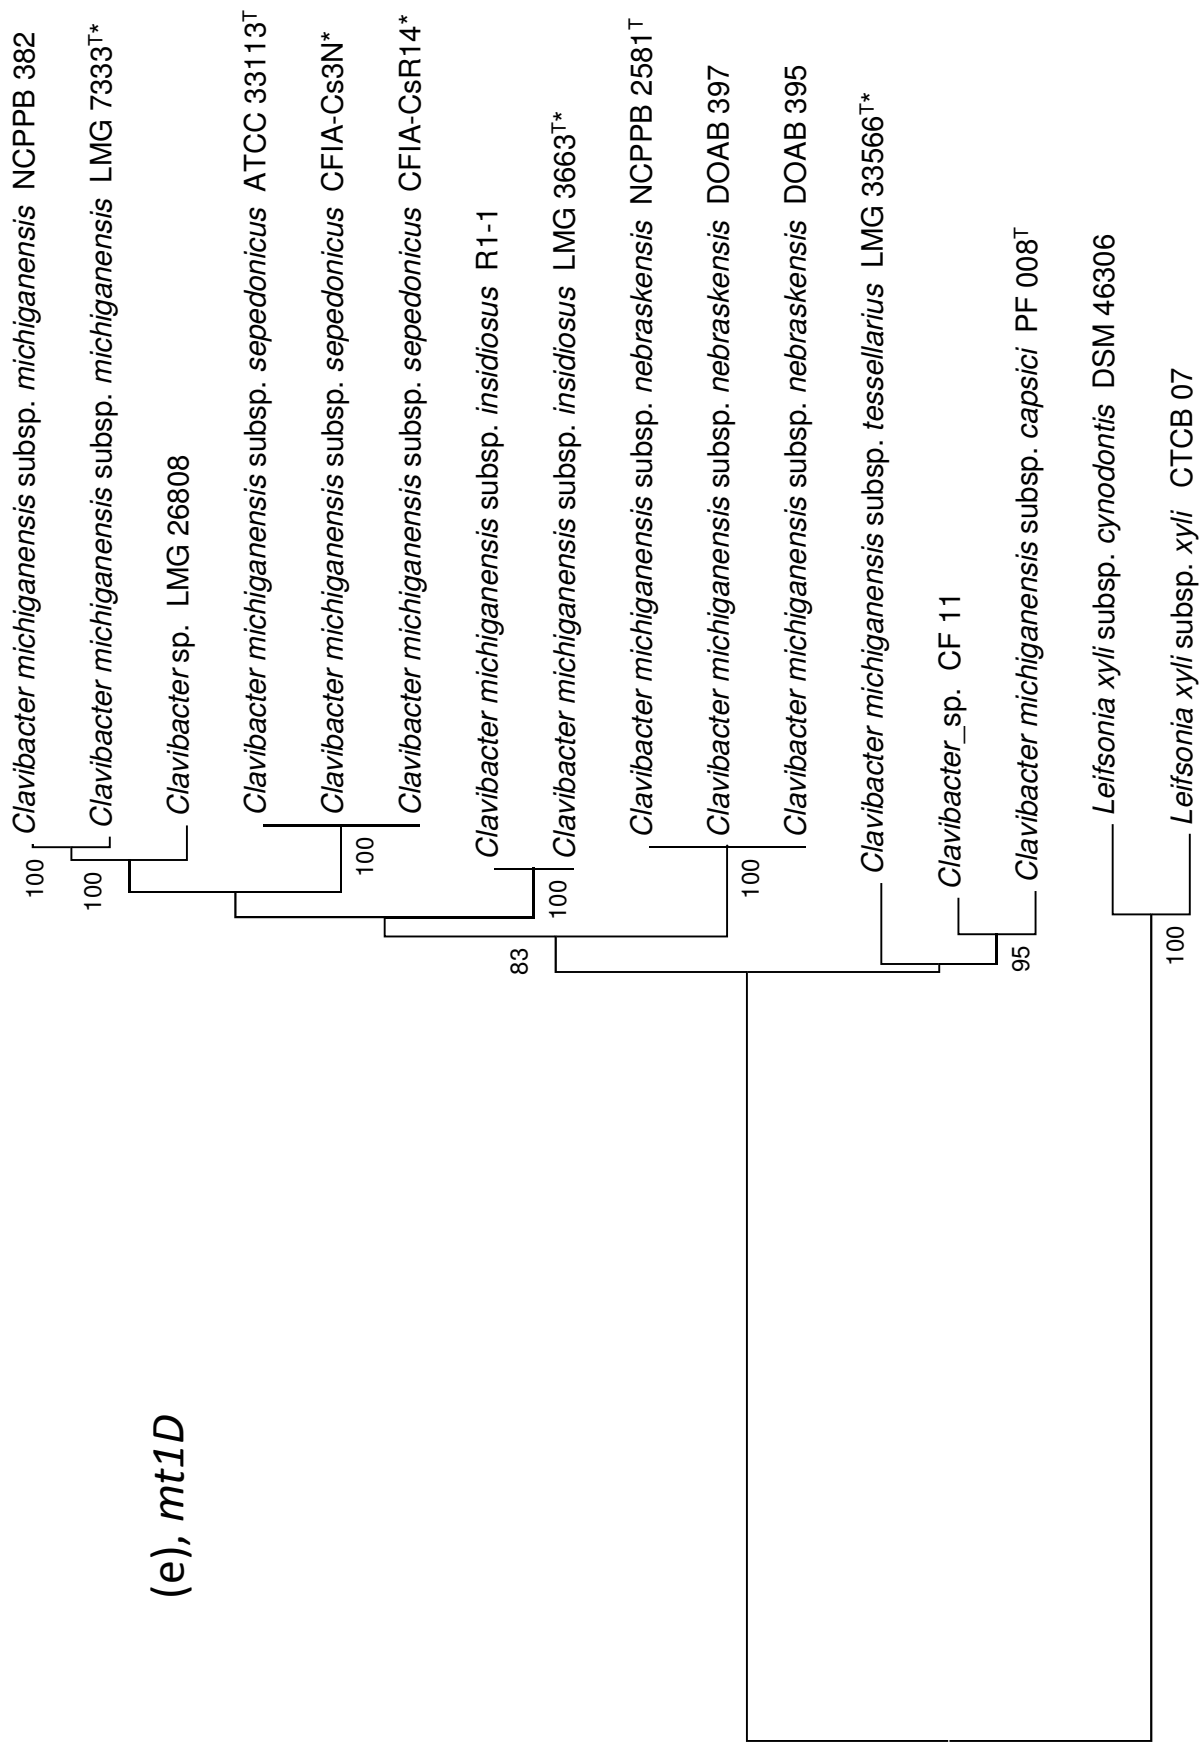

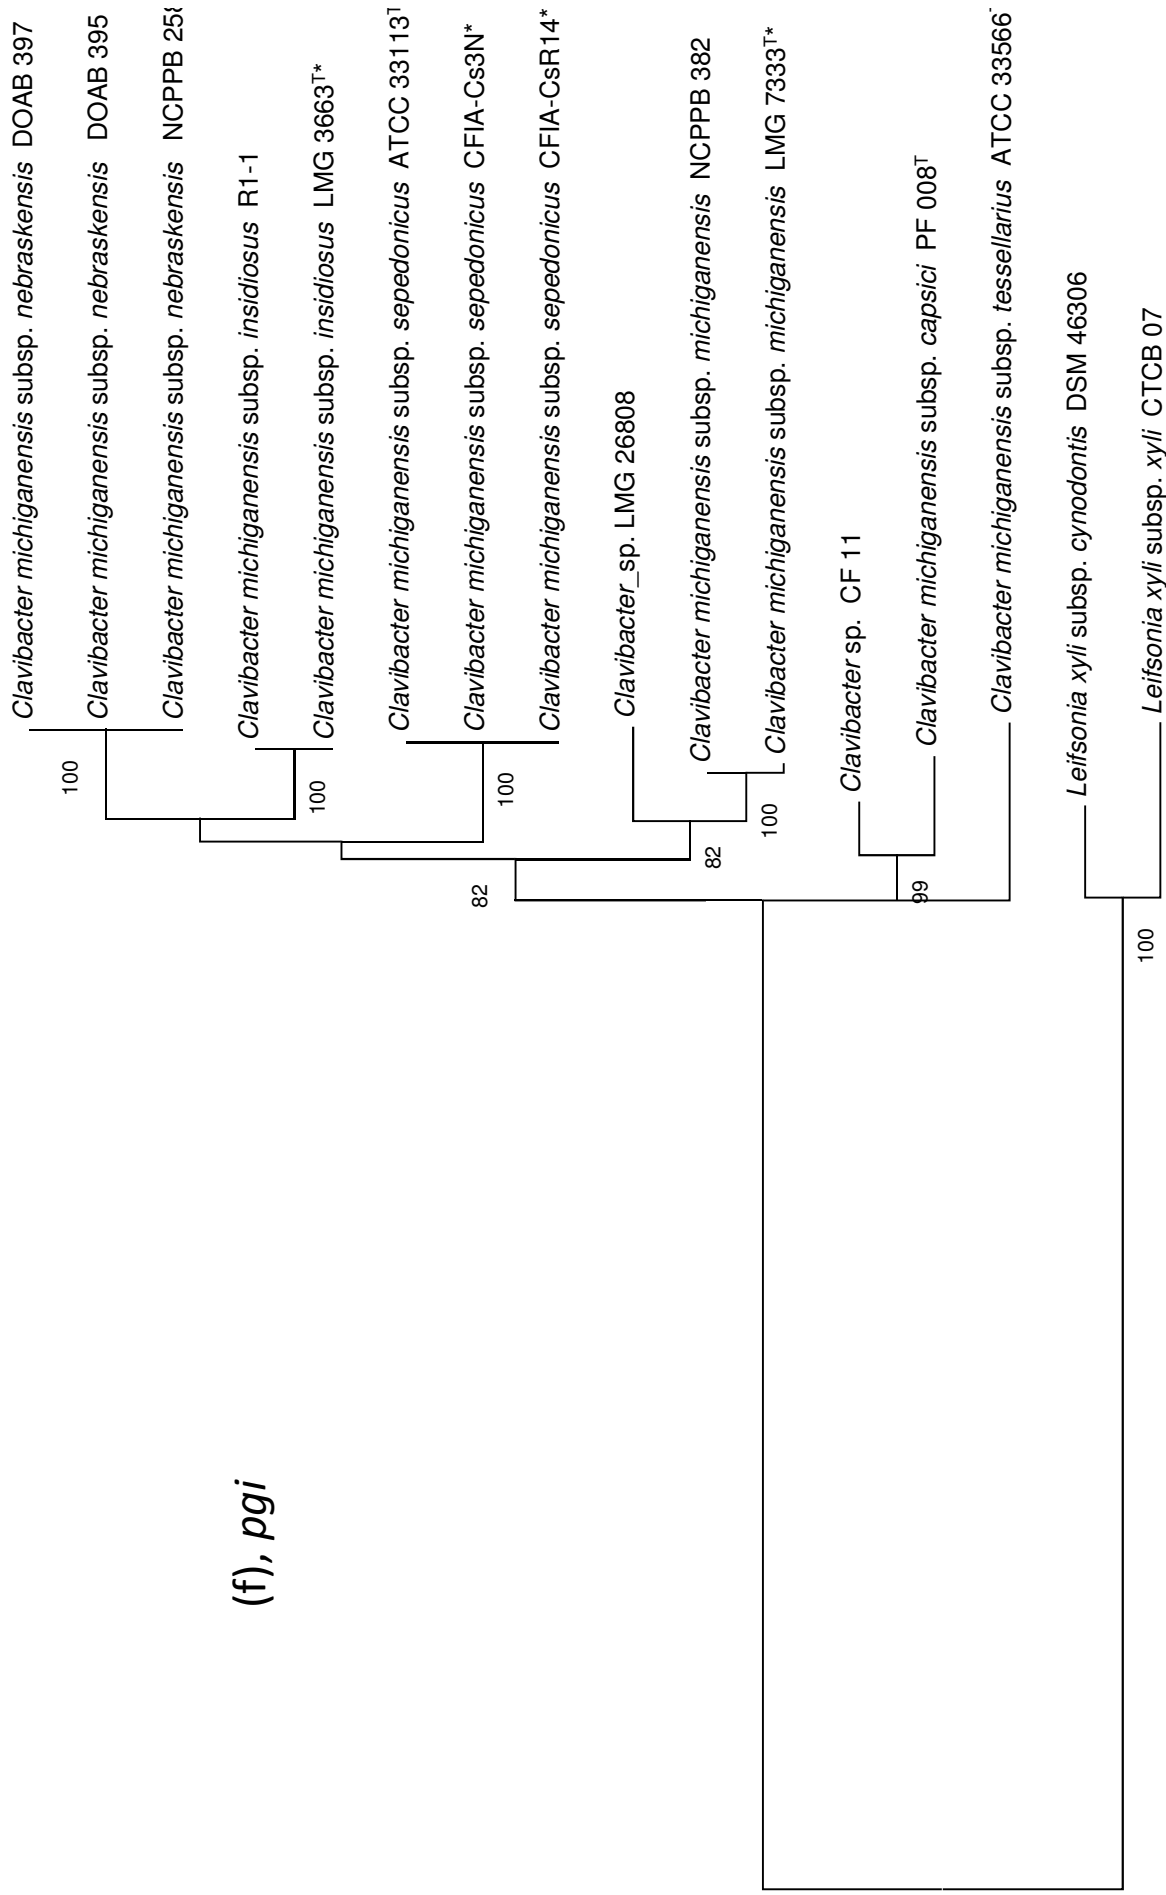

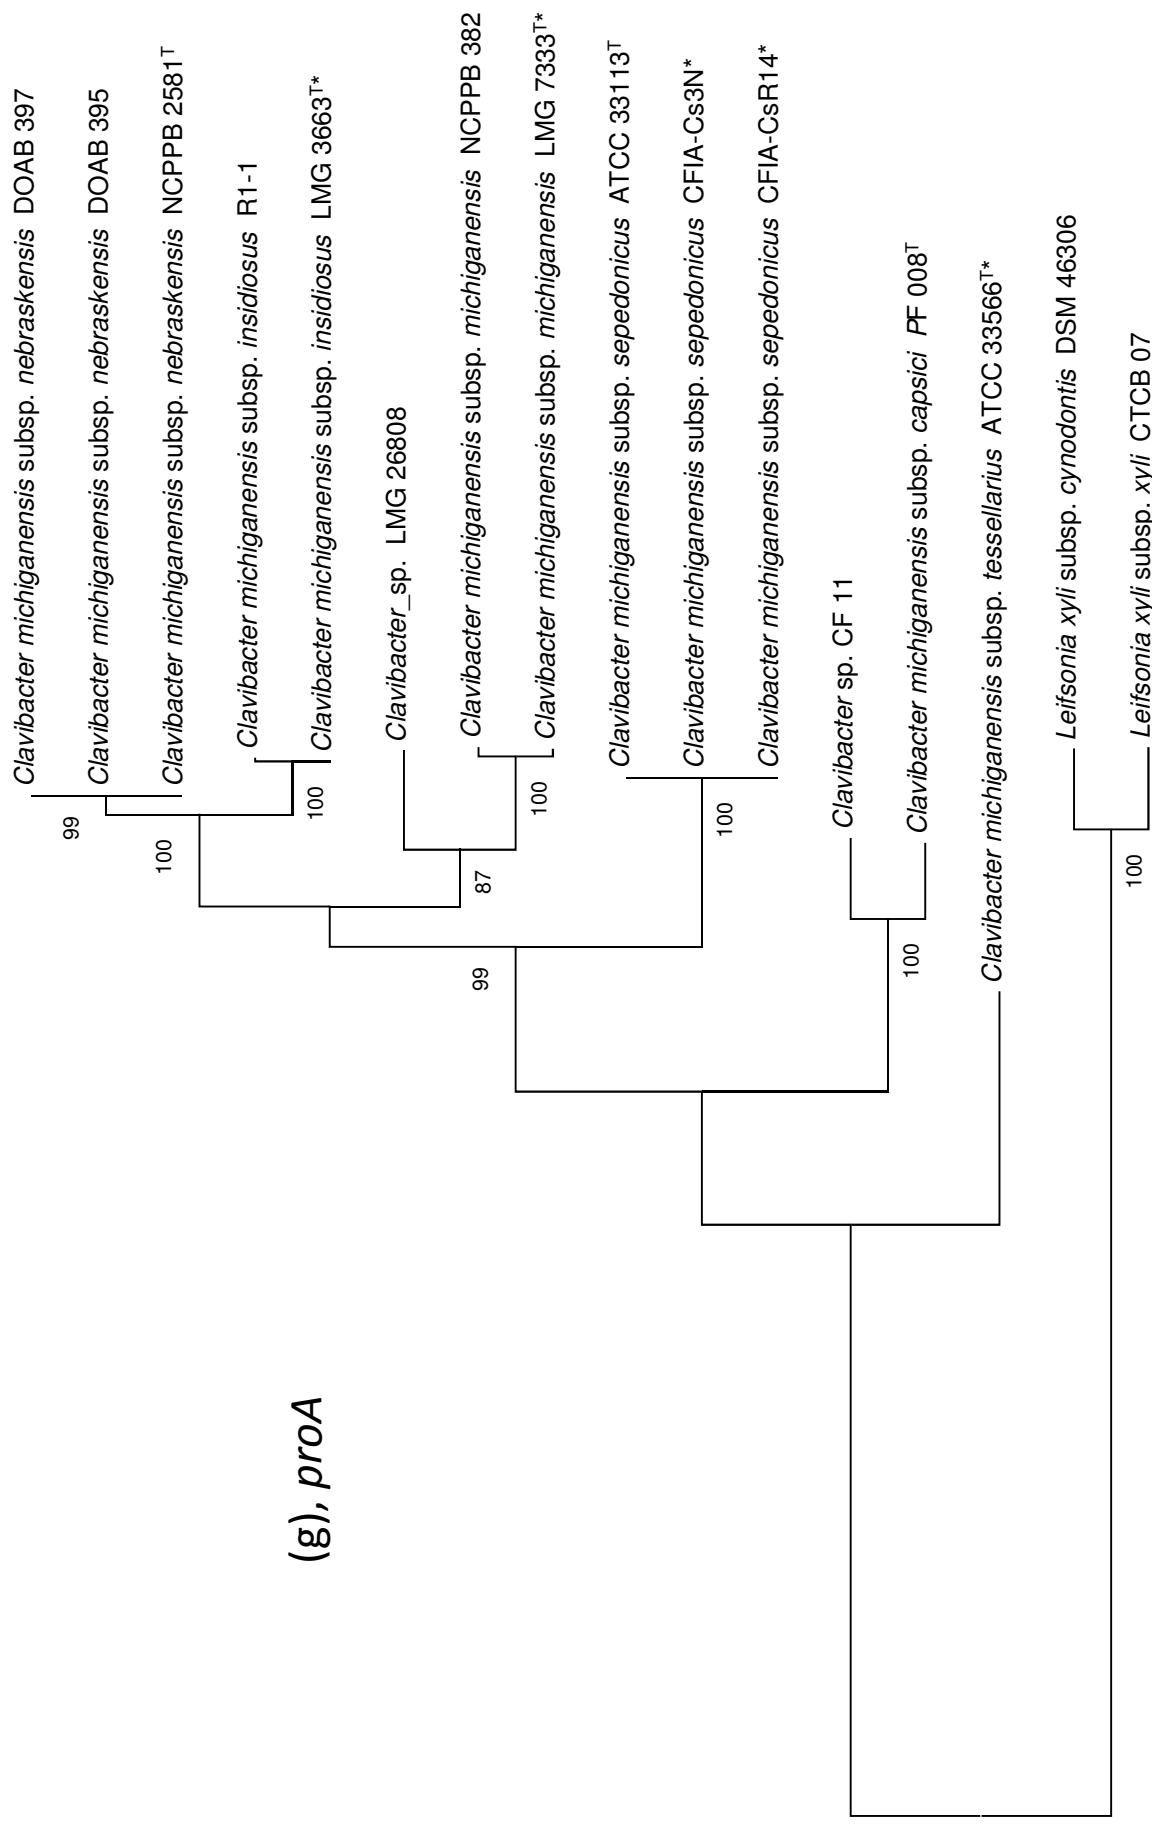

0.05
